# Supplementary material for: Further Evidence of Subphenotype Association with Systemic Lupus Erythematosus Susceptibility Loci: A European Cases Only Study
Source: PLoS One. 2012 Sep 26;7(9):e45356. doi: 10.1371/journal.pone.0045356 (PMC3458859; doi:10.1371/journal.pone.0045356)
Supplement: Table S2 — SLE clinical characteristics showing association with SLE susceptibility SNPs including data adjusted by gender and time of follow-up. aThis result is only for men and therefore the adjustment has been made only for time of follow-up. (XLS) [file pone.0045356.s002.xls]

## Sheet: Table S2
Table S2: SLE clinical characteristics showing association with SLE susceptibility SNPs including data adjusted by gender and time of follow-up
Feature	SNP	Locus	P		Padjust
Renal disorder	rs4240671	XKR6	0.0006		0.001
	rs13277113	C8orf13-BLK	0.003		0.007
	rs10156091	ICA1	0.03		0.03
	rs844644	TNFSF4	0.04		0.01
Disease onset <30	rs573775	ATG5	0.005		0.007
	rs7574865	STAT4	0.03		0.03
	rs17435	MECP2 a	0.003		0.02
Disease onset full range	rs7574865	STAT4	0.02		0.07
	rs17435	MECP2 a	0.02		0.06
Immunologic disorder	rs2205960	TNFSF4	0.01		0.002
	rs509749	LY9	0.01		0.04
	rs4240671	XKR6	0.04		0.003
Neurologic disorder	rs10488631	IRF5	0.01		0.08
	rs509749	LY9	0.04		0.2
Serositis	rs2667978	LYN	0.02		0.04
	rs2304256	TYK2	0.03		0.05
Discoid rash	rs729302	IRF5	0.02		0.04
	rs2304256	TYK2	0.03		0.07
Photosensitivity	rs1801274	FCGRIIA	0.03		0.03
	rs2205960	TNFSF4	0.03		0.1
Hematologic disorder	rs3131379	MSH5	0.03		0.06
Oral ulcers	rs2476601	PTPN22	0.04		0.2
a This result is only for men and therefore the adjustment has been made only for time of follow-up
